# Supplementary material for: Velocity-Selective Arterial Spin Labeling Perfusion in Monitoring High Grade Gliomas Following Therapy: Clinical Feasibility at 1.5T and Comparison with Dynamic Susceptibility Contrast Perfusion
Source: MDPI journal article supplement (doi:10.3390/brainsci14020126), 2024-01-25
Supplement: s1 [file s1]

**Table S1.** Clinical Profile

| pt | age | sex | group  | primary tumor diagnosis (WHO grade)                       | dd   | treatment history                       |
|----|-----|-----|--------|-----------------------------------------------------------|------|-----------------------------------------|
| 1  | 63  | M   | RT     | Glioblastoma (IV), IDH-wt, unknown MGMT                   | 301  | standard*                               |
| 2  | 54  | M   | RT     | Glioblastoma (IV), IDH-wt, MGMT methylated                | 2472 | standard                                |
| 3  | 77  | M   | RT     | Glioblastoma (IV), IDH-wt, MGMT methylated                | 755  | standard                                |
| 4  | 51  | F   | RT, H+ | Glioblastoma (IV), IDH-wt, unknown MGMT                   | 416  | standard + 2 surgeries + study**        |
| 5  | 56  | F   | RT     | Anaplastic Astrocytoma (III), IDH-wt, no MGMT methylation | 263  | standard                                |
| 6  | 22  | F   | RT     | Anaplastic Astrocytoma (III), IDH-wt, MGMT methylated     | 495  | standard                                |
| 7  | 70  | M   | RT, H+ | Glioblastoma (IV), IDH-wt, unknown MGMT                   | 425  | standard                                |
| 8  | 28  | F   | RT, H+ | Glioblastoma (IV), IDH-wt, unknown MGMT                   | 2333 | standard                                |
| 9  | 51  | M   | RT     | Glioblastoma (IV), IDH-wt, MGMT methylated                | 593  | standard + surgery + study <sup>†</sup> |
| 10 | 67  | M   | NRT    | Anaplastic Astrocytoma (III), unknown IDH/MGMT            | 8664 | radiation + PCV                         |
| 11 | 43  | M   | NRT    | Anaplastic Astrocytoma (III), unknown IDH/MGMT            | 3629 | standard                                |
| 12 | 43  | M   | NRT    | Anaplastic Astrocytoma (III), IDH-m, unknown MGMT         | 2580 | resection + radiation + PCV             |
| 13 | 62  | M   | NRT    | Glioblastoma (IV), IDH-wt, unknown MGMT                   | 225  | standard                                |
| 14 | 68  | M   | NRT    | Glioblastoma (IV), IDH-wt, unknown MGMT                   | 548  | standard + surgery                      |
| 15 | 79  | F   | NRT    | Glioblastoma (IV), IDH-wt, no MGMT methylation            | 1535 | standard                                |

|           |    |   |     |                                                           |      |                                                                 |
|-----------|----|---|-----|-----------------------------------------------------------|------|-----------------------------------------------------------------|
| <b>16</b> | 33 | F | NRT | Anaplastic Infiltrating Glioma (III), IDH-m, unknown MGMT | 1973 | standard + Mebendazol                                           |
| <b>17</b> | 41 | M | NRT | Anaplastic Astrocytoma (III), IDH-m, no MGMT methylation  | 2082 | standard                                                        |
| <b>18</b> | 66 | M | NRT | Glioblastoma (IV), IDH-wt, no MGMT methylation            | 281  | standard                                                        |
| <b>19</b> | 68 | F | NRT | Epitheloid Glioblastoma (IV), IDH-wt, MGMT methylated     | 121  | standard                                                        |
| <b>20</b> | 61 | F | NRT | Anaplastic Astrocytoma (III), IDH-m, unknown MGMT         | 4141 | standard                                                        |
| <b>21</b> | 62 | F | NRT | Glioblastoma (IV), IDH-wt, MGMT methylated                | 458  | standard + surgery                                              |
| <b>22</b> | 46 | M | NRT | Anaplastic Astrocytoma (III), unknown IDH/MGMT            | 4383 | standard                                                        |
| <b>23</b> | 64 | F | NRT | Diffuse Oligodendroglioma (III), unknown IDH/MGMT         | 7165 | standard                                                        |
| <b>24</b> | 69 | M | NRT | Glioblastoma (IV), IDH-wt, unknown MGMT                   | 2364 | standard + 2 surgeries                                          |
| <b>25</b> | 47 | M | NRT | Glioblastoma (IV), IDH-wt, MGMT methylated                | 1878 | standard + 3 surgeries + study <sup>§</sup> +<br>chemoradiation |
| <b>26</b> | 72 | F | NRT | Glioblastoma (IV), IDH-wt, unknown MGMT                   | 1964 | Standard                                                        |
| <b>27</b> | 43 | F | NRT | Anaplastic Astrocytoma (III), unknown IDH/MGMT            | 4318 | standard + Bevacizumab                                          |
| <b>28</b> | 39 | M | NRT | Anaplastic Astrocytoma (III), unknown IDH/MGMT            | 4831 | standard + surgery                                              |

Pt - patient, dd - days since diagnosis, WHO - World Health Organization, M - male, F - female, RT - residual/recurrent tumor, NRT - no residual/recurrent tumor, H+ - active tumor in histopathology (within 4 weeks of imaging), IDH - isocitrate dehydrogenase, wt - wild type, m - mutated, MGMT - O-6-methylguanine-DNA methyltransferase

PCV - Procarbazine, 1-(2-chloroethyl)-3-cyclohexyl-1-nitrosourea (CCNU, Lomustine), Vincristine

\* standard - 6 weeks of chemoradiation with Temozolomide (Temodar) followed by 6 cycles of adjuvant Temozolomide

\*\* N1604 - Phase 0/I study of AMG 232 at 240 mg 1x daily for 7 consecutive days every 21 days

† J1444 - Glioma Atkins-based Diet study

§ J11120 - Phase II trial with chemo-sensitizing low-dose radiation for 6 months (Radtx 0.5 Gy twice daily on Days 1-5 of the normal 28-day Temodar cycle)
